# Supplementary figures and images for: Association of heat shock protein 8 with atopic march in a murine experimental model
Source: PeerJ journal article supplement (doi:10.7717/peerj.13247), 2022-04-19

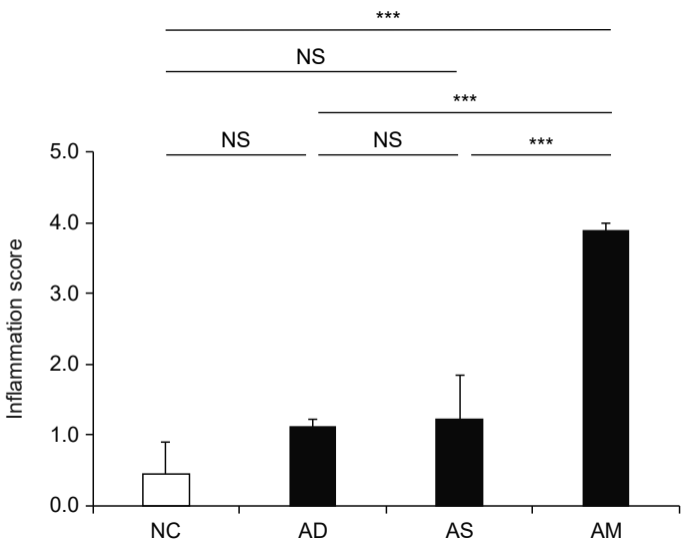

Supplement: Figure_supplemental_files.pdf [file Figure_supplemental_files.pdf]
